# Supplementary material for: The Status of Ethnobotanical Knowledge of Medicinal Plants and the Impacts of Resettlement in Delanta, Northwestern Wello, Northern Ethiopia
Source: PubMed Central journal article supplement (PMC4737471; doi:10.1155/2016/5060247), 2016-01-13
Supplement: 5060247.f1.pdf [file 5060247.f1.pdf]

Appendix 1: List of total MP species with local names, habits and habitats collected in the study area

Description of data: Ha-Habit (S= Shrub H=Herb T=Tree); Hab-Habitat (Hg=Homegarden, Hgw=Homegarden & Wild, Fl=Farmland, Ev=Enclosed vegetation, Evu=Enclosed and unenclosed vegetation, Al=All); + indicates - endemic to Ethiopia and/or shared with Eritrea, \* not listed as multiuse; \*\*\*cultivated.

| No. | Scientific name                                                | Local name (Amharic) | Family        | H a. | Hab. | Spp. Abu | Geographical location                                      | Coll.No |
|-----|----------------------------------------------------------------|----------------------|---------------|------|------|----------|------------------------------------------------------------|---------|
| 1   | <i>Achyranthes aspera</i> L.                                   | Telenj               | Amaranthaceae | H    | Al   | Spa      | 2653m; 11 <sup>0</sup> 40.177'N, 039 <sup>0</sup> 19.813'E | MM005   |
| 2   | <i>Aeonium leocoblepharum</i> A.Rich.                          | Yetota-kita          | Crassulaceae  | H    | Evu  | Rare     | 2578m; 11 <sup>0</sup> 40.165'N, 039 <sup>0</sup> 19.969'E | MM112   |
| 3   | <i>Ajuga integrifolia</i> * Ham.-Buch.                         | Tut-astil            | Lamiaceae     | H    | Evu  | Rare     | 2664m; 11 <sup>0</sup> 40.180'N, 039 <sup>0</sup> 19.811'E | MM092   |
| 4   | <i>Allium cepa</i> L.***                                       | Key Shinkurt         | Alliaceae     | H    | Hg   | Com      | 2665m; 11 <sup>0</sup> 40.157'N, 039 <sup>0</sup> 19.803'E | MM117   |
| 5   | <i>Allium sativum</i> L.***                                    | Nech Shinkurt        | Alliaceae     | H    | Hg   | Spa      | 2667m; 11 <sup>0</sup> 40.047'N, 039 <sup>0</sup> 19.809'E | MM044   |
| 6   | <i>Aloe camperi</i> Schweinf.                                  | Wende-eret           | Aloaceae      | S    | Evu  | Com      | 2625m; 11 <sup>0</sup> 39.056'N, 039 <sup>0</sup> 19.478'E | MM124   |
| 7   | <i>Aloe pulcherrima</i> <sup>+</sup> Gilbert & Sebsebe (ined.) | Set-eret             | Aloaceae      | S    | Hgw  | Rare     | 2667m; 11 <sup>0</sup> 40.047'N, 039 <sup>0</sup> 19.809'E | MM43    |
| 8   | <i>Artemisia abyssinica</i> * Sch.Bip.ex A.Rich.               | Chikugn              | Asteraceae    | H    | Al   | Com      | 2667m; 11 <sup>0</sup> 40.047'N, 039 <sup>0</sup> 19.809'E | MM042   |
| 9   | <i>Arundo donax</i> L.                                         | Shenbeqo             | Poaceae       | H    | Ev   | Spa      | 2181m; 11 <sup>0</sup> 42.527'N, 039 <sup>0</sup> 20.960'E | MM158   |
| 10  | <i>Asparagus africanus</i> Lam.                                | Kestenicha           | Asparagaceae  | S    | Evu  | Rare     | 2651m; 11 <sup>0</sup> 38.147'N, 039 <sup>0</sup> 19.830'E | MM23    |
| 11  | <i>Bersama abyssinica</i> Fresen.                              | Azamir               | Melanthaceae  | S    | Evu  | Rare     | 2584m; 11 <sup>0</sup> 40.074'N, 039 <sup>0</sup> 19.594'E | MM53    |
| 12  | <i>Brassica nigra</i> (L.) Koch in Rohling***                  | Senafich             | Brassicaceae  | H    | Fl   | Spa      | 2675m; 11 <sup>0</sup> 40.175'N, 039 <sup>0</sup> 19.813'E | MM039   |
| 13  | <i>Buddleja polystachya</i> Fresen.                            | Amfar                | Loganiaceae   | S    | Evu  | Rare     | 2530m; 11 <sup>0</sup> 40.046'N, 039 <sup>0</sup> 19.754'E | MM017   |
| 14  | <i>Caesalpinia decapetala</i> (Roth.)                          | Kentefa              | Fabaceae      | Cl   | Evu  | Rare     | 2577m; 11 <sup>0</sup> 39.612'N, 039 <sup>0</sup> 19.556'E | MM125   |

|    |                                                               |                   |                |    |     |      |                                                            |       |
|----|---------------------------------------------------------------|-------------------|----------------|----|-----|------|------------------------------------------------------------|-------|
|    | <i>Alston</i>                                                 |                   |                |    |     |      |                                                            |       |
| 15 | <i>Calotropis procera</i> * (Ait) Ait.f.                      | Tobbiya           | Asclepiadaceae | S  | Evu | Rare | 2205m; 11 <sup>0</sup> 38.528'N, 039 <sup>0</sup> 19.813'E | MM079 |
| 16 | <i>Calpurnia aurea</i> (Ait.) Benth.                          | Digita            | Fabaceae       | S  | Hgw | Spa  | 2528m; 11 <sup>0</sup> 40.041'N, 039 <sup>0</sup> 19.700'E | MM018 |
| 17 | <i>Capparis tomentosa</i> Lam.                                | Gimero            | Capparidaceae  | S  | Evu | Rare | 2093m; 11 <sup>0</sup> 38.342'N, 039 <sup>0</sup> 20.274'E | MM073 |
| 18 | <i>Capsicum annum</i> L.***                                   | Kariya            | Solanaceae     | H  | Hg  | Spa  | 2193m; 11 <sup>0</sup> 41.174'N, 039 <sup>0</sup> 20.908'E | MM131 |
| 19 | <i>Carduus schimperi</i> Sch. Bip.ex A.Rich.                  | Yemidr<br>Koshele | Asteraceae     | H  | Evu | Rare | 3202m; 11 <sup>0</sup> 40.551'N, 039 <sup>0</sup> 15.534'E | MM103 |
| 20 | <i>Carissa spinarum</i> L.                                    | Agam              | Apocynaceae    | S  | Evu | Spa  | 2392m; 11 <sup>0</sup> 38.818'N, 039 <sup>0</sup> 19.454'E | MM021 |
| 21 | <i>Carthamus lanatus</i> L.                                   | Koshele           | Asteraceae     | H  | Fl  | Spa  | 2586m; 11 <sup>0</sup> 40.177'N, 039 <sup>0</sup> 19.960'E | MM136 |
| 22 | <i>Catha edulis</i> (Vahl.) Forssk.ex Endl.***                | Chat              | Celastraceae   | T  | Hg  | Spa  | 2668m; 11 <sup>0</sup> 40.174'N, 039 <sup>0</sup> 19.812'E | MM091 |
| 23 | <i>Ceratostigma abyssinicum</i> * (Hochst.) Schweinf. & Asch. | Key Telenj        | Plumbaginaceae | S  | Evu | Spa  | 2530m; 11 <sup>0</sup> 40.046'N, 039 <sup>0</sup> 19.754'E | MM016 |
| 24 | <i>Chenopodium schraderianum</i> Schult.                      | Sinign            | Chenopodiaceae | H  | Fl  | Spa  | 2584m; 11 <sup>0</sup> 40.074'N, 039 <sup>0</sup> 19.594'E | MM050 |
| 25 | <i>Cistanche tubulosa</i> * (Schenk) Hook.f.                  | Yesatmedanit      | Orobanchaceae  | H  | Fl  | Rare | 2205m; 11 <sup>0</sup> 38.528'N, 039 <sup>0</sup> 19.813'E | MM165 |
| 26 | <i>Citrus aurantifolia</i> (Christm.) Swingle***              | Lomie             | Rutaceae       | S  | Hg  | Spa  | 1994m; 11 <sup>0</sup> 38.038'N, 039 <sup>0</sup> 20.573'E | MM076 |
| 27 | <i>Clematis semensis</i> Fresen.                              | Azo-hareg         | Ranunculaceae  | Cl | Evu | Spa  | 2584m; 11 <sup>0</sup> 40.074'N, 039 <sup>0</sup> 19.594'E | MM054 |
| 28 | <i>Clerodendrum myricoides</i> (Hochst.) Vatke.               | Missiroch         | Lamiaceae      | S  | Ev  | Spa  | 2392m; 11 <sup>0</sup> 38.818'N, 039 <sup>0</sup> 19.454'E | MM045 |
| 29 | <i>Clutia abyssinica</i> Jaub. & Spach.                       | Fiyel-afege       | Euphorbiaceae  | S  | Evu | Com  | 2997m; 11 <sup>0</sup> 40.404'N, 039 <sup>0</sup> 19.086'E | MM110 |
| 30 | <i>Colutea abyssinica</i> Kunth & Bouche                      | Duaduate          | Fabaceae       | S  | Ev  | Rare | 3200m; 11 <sup>0</sup> 40.520'N, 039 <sup>0</sup> 16.799'E | MM104 |
| 31 | <i>Combretum molle</i> R. Br.ex G. Don.                       | Aballo            | Combretaceae   | T  | Evu | Rare | 2097m; 11 <sup>0</sup> 38.259'N, 039 <sup>0</sup> 20.309'E | MM081 |
| 32 | <i>Conyza hypoleuca</i> A. Rich.                              | Nechillo          | Asteraceae     | S  | Evu | Com  | 2814m; 11 <sup>0</sup> 36.829'N, 039 <sup>0</sup> 13.637'E | MM161 |
| 33 | <i>Coriandrum sativum</i> L.***                               | Dimblal           | Apiaceae       | H  | Hg  | Com  | 2664m; 11 <sup>0</sup> 40.180'N, 039 <sup>0</sup> 19.811'E | MM093 |
| 34 | <i>Croton macrostachyus</i> Del.                              | Mekenisa/Bissana  | Euphorbiaceae  | T  | Hgw | Rare | 2485m; 11 <sup>0</sup> 40.011'N, 039 <sup>0</sup> 19.898'E | MM032 |

|    |                                                                         |                 |               |    |     |      |                                                            |       |
|----|-------------------------------------------------------------------------|-----------------|---------------|----|-----|------|------------------------------------------------------------|-------|
| 35 | <i>Cucumis ficifolus</i> A.Rich                                         | Yemdir-embuay   | Cucurbitaceae | H  | Al  | Spa  | 2656m; 11 <sup>0</sup> 38.117°N, 039 <sup>0</sup> 19.806°E | MM22  |
| 36 | <i>Cucurbita pepo</i> L.***                                             | Duba            | Cucurbitaceae | H  | Hg  | Spa  | 2669m; 11 <sup>0</sup> 40.167°N, 039 <sup>0</sup> 19.811°E | MM115 |
| 37 | <i>Cyathula uncinulata</i> * (Schrad.) Schinz.                          | Kuno/Kugno      | Amaranthaceae | H  | Evu | Com  | 2584m; 11 <sup>0</sup> 40.074°N, 039 <sup>0</sup> 19.594°E | MM052 |
| 38 | <i>Cynoglossum coeruleum</i> Hochst. ex A.DC. in DC. ssp. Johnstonii    | Hulu-zemedede   | Boraginaceae  | H  | Fl  | Com  | 2672m; 11 <sup>0</sup> 39.432°N, 039 <sup>0</sup> 18.692°E | MM048 |
| 39 | <i>Cyphostemma adenocaulis</i> * (Steud.ex A. Rich) Desc. ex Wild & Dr. | Aserkush        | Vitaceae      | Cl | Evu | Com  | 2205m; 11 <sup>0</sup> 38.528°N, 039 <sup>0</sup> 19.813°E | MM082 |
| 40 | <i>Datura stramonium</i> * L.                                           | Banjie          | Solanaceae    | H  | Hg  | Com  | 2531m; 11 <sup>0</sup> 40.047°N, 039 <sup>0</sup> 19.755°E | MM014 |
| 41 | <i>Debregeasia saeneb</i> (Forssk.) Hepper & Wood                       | Dorofes         | Urticaceae    | S  | Evu | Com  | 2596m; 11 <sup>0</sup> 41.975°N, 039 <sup>0</sup> 20.684°E | MM150 |
| 42 | <i>Dodonaea angustifolia</i> L.f.                                       | Kitkita         | Sapindaceae   | S  | Evu | Com  | 2500m; 11 <sup>0</sup> 40.965°N, 039 <sup>0</sup> 19.850°E | MM030 |
| 43 | <i>Dyschobriste radicans</i> (A.Rich.) Nees                             | Yesheftmedanit  | Acanthaceae   | H  | Evu | Spa  | 2522m; 11 <sup>0</sup> 38.041°N, 039 <sup>0</sup> 19.717°E | MM029 |
| 44 | <i>Echinops hispidus</i> * Fresen.                                      | Kebercho        | Asteraceae    | H  | Fl  | Rare | 2680m; 11 <sup>0</sup> 40.218°N, 039 <sup>0</sup> 19.693°E | MM058 |
| 45 | <i>Ehretia cymosa</i> Thonn.                                            | Wulaga          | Boraginaceae  | S  | Ev  | Rare | 2069m; 11 <sup>0</sup> 40.532°N, 039 <sup>0</sup> 21.077°E | MM097 |
| 46 | <i>Ekebergia capensis</i> Sparrm.                                       | -----           | Meliaceae     | T  | Ev  | Spa  | 2584m; 11 <sup>0</sup> 40.074°N, 039 <sup>0</sup> 19.594°E | MM168 |
| 47 | <i>Eleusine floccifolia</i>                                             | Akrma           | Poaceae       | H  | Hg  | Com  | 2841m; 11 <sup>0</sup> 42.527°N, 039 <sup>0</sup> 20.960°E | MM164 |
| 48 | <i>Eucalyptus camaldulensis</i> Dehnh.***                               | Key Bahrzaf     | Myrtaceae     | T  | Ev  | Spa  | 2539m; 11 <sup>0</sup> 36.827°N, 039 <sup>0</sup> 13.688°E | MM143 |
| 49 | <i>Eucalyptus globulus</i> Labill.***                                   | Nech Bahrzaf    | Myrtaceae     | T  | Ev  | Com  | 3253m; 11 <sup>0</sup> 40.171°N, 039 <sup>0</sup> 16.756°E | MM108 |
| 50 | <i>Euphorbia abyssinica</i> Gmelin.                                     | Qulqual         | Euphorbiaceae | T  | Hgw | Com  | 2506m; 11 <sup>0</sup> 39.993°N, 039 <sup>0</sup> 20.053°E | MM094 |
| 51 | <i>Euphorbia platyphyllos</i> * L.                                      | Anterfa         | Euphorbiaceae | H  | Fl  | Com  | 1802m; 11 <sup>0</sup> 36.627°N, 039 <sup>0</sup> 13.588°E | MM154 |
| 52 | <i>Euphorbia polyacantha</i> * Boiss.                                   | Yeberha-qulqual | Euphorbiaceae | S  | Evu | Rare | 2299m; 11 <sup>0</sup> 38.086°N, 039 <sup>0</sup> 19.893°E | MM089 |
| 53 | <i>Euphorbia tirucalli</i> L.                                           | Denbekinchbt    | Euphorbiaceae | S  | Hg  | Spa  | 2007m; 11 <sup>0</sup> 40.853°N, 039 <sup>0</sup> 19.767°E | MM090 |
| 54 | <i>Euryops pinifolius</i> <sup>+</sup> A. Rich.                         | Cherenfe        | Asteraceae    | H  | Evu | Spa  | 3676m; 11 <sup>0</sup> 44.819°N, 039 <sup>0</sup> 26.415°E | MM149 |

|    |                                                                             |                    |               |   |     |      |                                                            |       |
|----|-----------------------------------------------------------------------------|--------------------|---------------|---|-----|------|------------------------------------------------------------|-------|
| 55 | <i>Ferula communis</i> L.                                                   | Dog                | Apiaceae      | H | Evu | Com  | 2959m; 11 <sup>0</sup> 39.984°N, 039 <sup>0</sup> 19.066°E | MM060 |
| 56 | <i>Ficus palmata</i> Forssk.                                                | Beles              | Moraceae      | S | Evu | Spa  | 2572m; 11 <sup>0</sup> 40.054°N, 039 <sup>0</sup> 19.583°E | MM049 |
| 57 | <i>Ficus vasta</i> Forssk.                                                  | Warka              | Moraceae      | T | Evu | Spa  | 2343m; 11 <sup>0</sup> 38.727°N, 039 <sup>0</sup> 19.443°E | MM071 |
| 58 | <i>Foeniculum vulgare</i> * Mill.***                                        | Ensilal            | Apiaceae      | H | Fl  | Rare | 2600m; 11 <sup>0</sup> 39.277°N, 039 <sup>0</sup> 19.841°E | MM085 |
| 59 | <i>Gossypium hirsutum</i> L.***                                             | Tit                | Malvaceae     | S | Hg  | Rare | 2244m; 11 <sup>0</sup> 38.619°N, 039 <sup>0</sup> 19.781°E | MM084 |
| 60 | <i>Grewia ferruginea</i> Hochst.ex A.Rich.                                  | Lenquata           | Tiliaceae     | S | Ev  | Spa  | 2193m; 11 <sup>0</sup> 41.174°N, 039 <sup>0</sup> 20.908°E | MM132 |
| 61 | <i>Guizotia abyssinica</i> (L.f.) Cass.***                                  | Nug                | Asteraceae    | H | Fl  | Com  | 2665m; 11 <sup>0</sup> 40.178°N, 039 <sup>0</sup> 19.812°E | MM128 |
| 62 | <i>Hagenia abyssinica</i> (Bruce) J.F. Gmel.                                | Kosso              | Rosaceae      | T | Hg  | Rare | 3206m; 11 <sup>0</sup> 40.250°N, 039 <sup>0</sup> 16.915°E | MM140 |
| 63 | <i>Hibiscus eriospermus</i> Hochst.ex Cuf.                                  | Tija-chenger       | Malvaceae     | S | Ev  | Spa  | 2387m; 11 <sup>0</sup> 40.949°N, 039 <sup>0</sup> 21.287°E | MM098 |
| 64 | <i>Hypoestes forskoolii</i> (Vahl) R.Br.                                    | Key-matebia        | Acanthaceae   | H | Evu | Com  | 2653m; 11 <sup>0</sup> 38.432°N, 039 <sup>0</sup> 18.692°E | MM087 |
| 65 | <i>Impatiens rothii</i> <sup>+</sup> Hook.f.                                | Gushirt            | Balsaminaceae | H | Evu | Rare | 2632m; 11 <sup>0</sup> 40.166°N, 039 <sup>0</sup> 19.898°E | MM138 |
| 66 | <i>Inula confertiflora</i> <sup>+</sup> A. Rich.                            | Weynagift          | Asteraceae    | S | Hgw | Com  | 2997m; 11 <sup>0</sup> 40.404°N, 039 <sup>0</sup> 19.086°E | MM109 |
| 67 | <i>Jasminum grandiflorum</i> L.                                             | Tembelel           | Oleaceae      | S | Hgw | Spa  | 2662m; 11 <sup>0</sup> 38.432°N, 039 <sup>0</sup> 18.693°E | MM006 |
| 68 | <i>Juniperus procera</i> Hochst. ex A. Engl.                                | Tid                | Cuppressaceae | T | Ev  | Rare | 2661m; 11 <sup>0</sup> 40.161°N, 039 <sup>0</sup> 19.815°E | MM127 |
| 69 | <i>Justicia schimperiana</i> (Hochst.ex Nees) T. Anders                     | Sensel             | Acanthaceae   | S | Hgw | Spa  | 2700m; 11 <sup>0</sup> 40.125°N, 039 <sup>0</sup> 19.770°E | MM306 |
| 70 | <i>Kalanchoe petitiana</i> <sup>+</sup> A.Rich.                             | Endehulla/Fitf ita | Crassulaceae  | H | Evu | Com  | 2815m; 11 <sup>0</sup> 43.263°N, 039 <sup>0</sup> 22.435°E | MM147 |
| 71 | <i>Lagenaria siceraria</i> (Molina) Standl.***                              | Kil                | Cucurbitaceae | H | Hg  | Com  | 2669m; 11 <sup>0</sup> 40.157°N, 039 <sup>0</sup> 19.803°E | MM116 |
| 72 | <i>Laggera tomentosa</i> <sup>+</sup> (Sch. Bip.ex A. Rich.) Oliv. & Hiern. | Alashume           | Asteraceae    | H | Al  | Com  | 2632m; 11 <sup>0</sup> 40.166°N, 039 <sup>0</sup> 19.898°E | MM137 |
| 73 | <i>Launaea intybacea</i> (Jacq.) Beauv.                                     | Yewushamlas        | Asteraceae    | H | Fl  | Com  | 2815m; 11 <sup>0</sup> 43.263°N, 039 <sup>0</sup> 22.435°E | MM145 |
| 74 | <i>Leonotis ocymifolia</i> (Burm.f.) Iwarsson                               | Ferszeng           | Lamiaceae     | S | Hgw | Rare | 2997m; 11 <sup>0</sup> 40.404°N, 039 <sup>0</sup> 19.086°E | MM111 |
| 75 | <i>Lepidium sativum</i> L.***                                               | Feto               | Brassicaceae  | H | Hg  | Com  | 2659m; 11 <sup>0</sup> 40.174°N, 039 <sup>0</sup> 19.811°E | MM010 |

|    |                                                             |               |                |    |     |      |                                                            |       |
|----|-------------------------------------------------------------|---------------|----------------|----|-----|------|------------------------------------------------------------|-------|
| 76 | <i>Leucas martinicensis</i> * (Jacq.)<br>R.Br.              | Raskemir      | Lamiaceae      | H  | Fl  | Com  | 2662m; 11 <sup>0</sup> 40.172'N, 039 <sup>0</sup> 19.823'E | MM067 |
| 77 | <i>Lippia adoensis</i> <sup>+</sup> Hochst. Ex Walp.        | Ayib-kessie   | Verbenaceae    | S  | Evu | Com  | 2814m; 11 <sup>0</sup> 36.829'N, 039 <sup>0</sup> 13.637'E | MM139 |
| 78 | <i>Lobelia rhynchopetalum</i> <sup>+</sup> Hemsl.           | Jebera        | Lobeliaceae    | H  | Evu | Rare | 3702m; 11 <sup>0</sup> 44.968'N, 039 <sup>0</sup> 26.505'E | MM152 |
| 79 | <i>Malva verticillata</i> L.                                | Lut           | Malvaceae      | H  | Fl  | Com  | 2679m; 11 <sup>0</sup> 40.175'N, 039 <sup>0</sup> 19.812'E | MM114 |
| 80 | <i>Mentha longifolia</i> (L.) Huds.                         | Shall         | Lamiaceae      | H  | Evu | Com  | 2181m; 11 <sup>0</sup> 40.604'N, 039 <sup>0</sup> 20.817'E | MM156 |
| 81 | <i>Momordica foetida</i> * Schumach.                        | Yekura-hareg  | Cucurbitaceae  | Cl | Evu | Spa  | 2585m; 11 <sup>0</sup> 43.535'N, 039 <sup>0</sup> 23.063'E | MM121 |
| 82 | <i>Myrica salicifolia</i> Hochst.ex<br>A.Rich.              | Shinet        | Myricaceae     | T  | Evu | Rare | 2596m; 11 <sup>0</sup> 41.972'N, 039 <sup>0</sup> 20.683'E | MM148 |
| 83 | <i>Myrsine africana</i> L.                                  | Kerchemo      | Myrsinaceae    | S  | Ev  | Spa  | 2621m; 11 <sup>0</sup> 39.852'N, 039 <sup>0</sup> 19.352'E | MM126 |
| 84 | <i>Myrtus communis</i> L.***                                | Ades          | Myrtaceae      | S  | Hg  | Rare | 2662m; 11 <sup>0</sup> 38.432'N, 039 <sup>0</sup> 18.693'E | MM162 |
| 85 | <i>Nicotiana rustica</i> L.***                              | Tinbaho/Atiya | Solanaceae     | H  | Hg  | Rare | 2902m; 11 <sup>0</sup> 38.555'N, 039 <sup>0</sup> 18.847'E | MM122 |
| 86 | <i>Nigella sativa</i> L.***                                 | Tikur Azmud   | Ranunculaceae  | H  | Hg  | Rare | 2004m; 11 <sup>0</sup> 38.065'N, 039 <sup>0</sup> 20.557'E | MM080 |
| 87 | <i>Ocimum lamiifolium</i> Hochst.ex<br>Benth.               | Damakessie    | Lamiaceae      | S  | Hgw | Rare | 2641m; 11 <sup>0</sup> 40.123'N, 039 <sup>0</sup> 19.765'E | MM011 |
| 88 | <i>Olea europaea</i> ssp.cuspidata<br>(Wall.ex G. Don) C.f. | Weyira        | Oleaceae       | T  | Hgw | Rare | 2672m; 11 <sup>0</sup> 39.432'N, 039 <sup>0</sup> 18.692'E | MM047 |
| 89 | <i>Orobanche ramosa</i> * L.                                | Yesatmedanit  | Orobanchaceae  | H  | Fl  | Rare | 2524m; 11 <sup>0</sup> 40.041'N, 039 <sup>0</sup> 19.876'E | MM035 |
| 90 | <i>Osyris quadripartita</i> Decn.                           | Keret         | Santalaceae    | S  | Ev  | Rare | 2522m; 11 <sup>0</sup> 38.041'N, 039 <sup>0</sup> 19.717'E | MM066 |
| 91 | <i>Otostegia fruticosa</i> (Forssk.)<br>Schweinf. ex Penzig | Geram-tinjut  | Lamiaceae      | S  | Ev  | Spa  | 2575m; 11 <sup>0</sup> 40.148'N, 039 <sup>0</sup> 19.959'E | MM070 |
| 92 | <i>Otostegia integrifolia</i> Benth.                        | Tinjut        | Lamiaceae      | S  | Evu | Com  | 2392m; 11 <sup>0</sup> 38.818'N, 039 <sup>0</sup> 19.454'E | MM019 |
| 93 | <i>Otostegia tomentosa</i> <sup>+</sup> (Chiov.)<br>Sebald. | Tarista       | Lamiaceae      | S  | Evu | Spa  | 2995m; 11 <sup>0</sup> 40.447'N, 039 <sup>0</sup> 19.101'E | MM135 |
| 94 | <i>Phytolacca dodecandra</i> L'Herit                        | Endod         | Phytolaccaceae | S  | Hg  | Com  | 2640m; 11 <sup>0</sup> 38.555'N, 039 <sup>0</sup> 18.847'E | MM015 |
| 95 | <i>Plectranthus cylindraceus</i><br>Hochst.ex Benth.        | Yewereza      | Lamiaceae      | H  | Evu | Spa  | 2654m; 11 <sup>0</sup> 40.115'N, 039 <sup>0</sup> 19.776'E | MM012 |
| 96 | <i>Polygala abyssinica</i> Fresen.                          | Yebabmedanit  | Polygalaceae   | H  | Ev  | Rare | 2530m; 11 <sup>0</sup> 40.174'N, 039 <sup>0</sup> 19.756'E | MM040 |

|     |                                                                                                      |               |                 |    |     |      |                                                            |       |
|-----|------------------------------------------------------------------------------------------------------|---------------|-----------------|----|-----|------|------------------------------------------------------------|-------|
| 97  | <i>Primula verticilata</i> * Forssk. ssp. <i>simensis</i> <sup>+</sup> * (Hochst.) W.W.Sm. & Forrest | Ayin-abirra   | Primulaceae     | H  | Evu | Rare | 3539m; 11 <sup>0</sup> 44.500°N, 039 <sup>0</sup> 26.133°E | MM146 |
| 98  | <i>Pteris dentate</i> * Forssk.                                                                      | Emis-anketkit | Pteridaceae     | H  | Evu | Com  | 2718m; 11 <sup>0</sup> 36.776°N, 039 <sup>0</sup> 13.814°E | MM167 |
| 99  | <i>Pteris pteridioides</i> * (Hook.) Ballard.                                                        | Etse-anbessa  | Pteridaceae     | H  | Evu | Com  | 2718m; 11 <sup>0</sup> 36.776°N, 039 <sup>0</sup> 13.814°E | MM144 |
| 100 | <i>Pulicaria schimperi</i> * DC.                                                                     | -----         | Asteraceae      | H  | Evu | Com  | 2483m; 11 <sup>0</sup> 40.050°N, 039 <sup>0</sup> 19.886°E | MM033 |
| 101 | <i>Rhamnus prinoides</i> L'herit.                                                                    | Gesho         | Rhamnaceae      | S  | Hg  | Com  | 2655m; 11 <sup>0</sup> 40.161°N, 039 <sup>0</sup> 19.811°E | MM064 |
| 102 | <i>Rhus glutinosa</i> A.Rich. ssp. <i>neoglutinosa</i> <sup>+</sup> M. Gilbert                       | Embiso        | Anacardiaceae   | T  | Al  | Spa  | 2655m; 11 <sup>0</sup> 40.161°N, 039 <sup>0</sup> 19.811°E | MM065 |
| 103 | <i>Rhus retinorrhoea</i> Oliv.                                                                       | Tallo         | Anacardiaceae   | S  | Ev  | Rare | 2193m; 11 <sup>0</sup> 41.174°N, 039 <sup>0</sup> 20.908°E | MM135 |
| 104 | <i>Rhynchosia minima</i> .                                                                           | Yems-jimat    | Fabaceae        | Cl | Fl  | Com  | 2586m; 11 <sup>0</sup> 40.177°N, 039 <sup>0</sup> 19.960°E | MM160 |
| 105 | <i>Ricinus communis</i> L.                                                                           | Agullo        | Euphorbiaceae   | H  | Hg  | Com  | 2658m; 11 <sup>0</sup> 40.171°N, 039 <sup>0</sup> 19.812°E | MM056 |
| 106 | <i>Rubus apetalus</i> Poir.                                                                          | Enjory        | Rosaceae        | S  | Ev  | Rare | 2281m; 11 <sup>0</sup> 41.246°N, 039 <sup>0</sup> 21.172°E | MM099 |
| 107 | <i>Rumex abyssinicus</i> Jacq.                                                                       | Embari-kolla  | Polygonaceae    | H  | Fl  | Spa  | 2905m; 11 <sup>0</sup> 39.961°N, 039 <sup>0</sup> 19.073°E | MM059 |
| 108 | <i>Rumex nepalensis</i> Spreng.                                                                      | Tult          | Polygonaceae    | H  | Fl  | Com  | 2675m; 11 <sup>0</sup> 40.175°N, 039 <sup>0</sup> 19.813°E | MM037 |
| 109 | <i>Rumex nervosus</i> Vahl.                                                                          | Embacho       | Polygonaceae    | S  | Al  | Com  | 2651m; 11 <sup>0</sup> 38.705°N, 039 <sup>0</sup> 18.956°E | MM007 |
| 110 | <i>Ruta chalepensis</i> L.***                                                                        | Tenadam       | Rutaceae        | H  | Hg  | Spa  | 2675m; 11 <sup>0</sup> 40.175°N, 039 <sup>0</sup> 19.813°E | MM038 |
| 111 | <i>Salvia schimperi</i> Benth.                                                                       | Gime-kitel    | Lamiaceae       | H  | Evu | Com  | 2662m; 11 <sup>0</sup> 40.177°N, 039 <sup>0</sup> 19.813°E | MM9   |
| 112 | <i>Schinus molle</i> L.***                                                                           | Kundoberbere  | Anacardiaceae   | T  | Hg  | Spa  | 2738m; 11 <sup>0</sup> 40.415°N, 039 <sup>0</sup> 19.476°E | MM069 |
| 113 | <i>Sesamum orientale</i> L.***                                                                       | Selit         | Pedaliaceae     | H  | Fl  | Rare | 2097m; 11 <sup>0</sup> 38.259°N, 039 <sup>0</sup> 20.309°E | MM072 |
| 114 | <i>Sida schimperiana</i> Hochst.ex A.Rich.                                                           | Chifrig       | Malvaceae       | H  | Evu | Com  | 2667m; 11 <sup>0</sup> 40.357°N, 039 <sup>0</sup> 20.009°E | MM153 |
| 115 | <i>Silene macrosolen</i> A.Rich.                                                                     | Wegert        | Caryophyllaceae | H  | Evu | Rare | 2832m; 11 <sup>0</sup> 40.231°N, 039 <sup>0</sup> 19.202°E | MM62  |
| 116 | <i>Solanecio gigas</i> <sup>+</sup> (Vatke.) C.Jeffrey                                               | Shikokogomn   | Asteraceae      | S  | Hg  | Spa  | 2667m; 11 <sup>0</sup> 40.604°N, 039 <sup>0</sup> 20.817°E | MM159 |
| 117 | <i>Solanum anguivi</i> Vatke.                                                                        | Zirch Embay   | Solanaceae      | S  | Evu | Rare | 2661m; 11 <sup>0</sup> 40.174°N, 039 <sup>0</sup> 19.811°E | MM120 |
| 118 | <i>Solanum incanum</i> L.                                                                            | Embuay        | Solanaceae      | S  | Evu | Com  | 2209m; 11 <sup>0</sup> 37.411°N, 039 <sup>0</sup> 19.239°E | MM008 |
| 119 | <i>Solanum marginatum</i> <sup>+</sup> L.f.                                                          | Geber-embuay  | Solanaceae      | S  | Evu | Spa  | 2832m; 11 <sup>0</sup> 40.231°N, 039 <sup>0</sup> 19.202°E | MM061 |
| 120 | <i>Solanum nigrum</i> L.                                                                             | Tikur Awut    | Solanaceae      | H  | Al  | Spa  | 2668m; 11 <sup>0</sup> 38.200°N, 039 <sup>0</sup> 19.877°E | MM026 |

|     |                                                                  |                  |                  |    |     |      |                                                            |       |
|-----|------------------------------------------------------------------|------------------|------------------|----|-----|------|------------------------------------------------------------|-------|
| 121 | <i>Stephania abyssinica</i> (Dillon & A.Rich.) Walp.             | Yeayit-hareg     | Menispermaceae   | Cl | Evu | Com  | 2584m; 11 <sup>0</sup> 38.128'N, 039 <sup>0</sup> 18.496'E | MM123 |
| 122 | <i>Striga hermonthica</i> * (Del.) Benth.                        | Yemashila-Kitign | Scrophulariaceae | H  | Fl  | Rare | 2524m; 11 <sup>0</sup> 40.041'N, 039 <sup>0</sup> 19.876'E | MM034 |
| 123 | <i>Thymus schimperi</i> <sup>+</sup> Ronniger                    | Tosign           | Lamiaceae        | H  | Evu | Com  | 3202m; 11 <sup>0</sup> 40.520'N, 039 <sup>0</sup> 16.534'E | MM105 |
| 124 | <i>Tragia brevipes</i> * Pax.                                    | Ablalit          | Euphorbiaceae    | H  | Evu | Rare | 2098m; 11 <sup>0</sup> 38.223'N, 039 <sup>0</sup> 20.312'E | MM077 |
| 125 | <i>Urtica simensis</i> <sup>+</sup> Steudel.                     | Sama             | Urticaceae       | H  | Hgw | Spa  | 2584m; 11 <sup>0</sup> 40.074'N, 039 <sup>0</sup> 19.594'E | MM051 |
| 126 | <i>Verbena officinalis</i> L.                                    | Atuch            | Verbenaceae      | H  | Fl  | Rare | 2268m; 11 <sup>0</sup> 40.868'N, 039 <sup>0</sup> 21.575'E | MM101 |
| 127 | <i>Verbscum sinaiticum</i> Benth.                                | Ketetina         | Scrophulariaceae | H  | Al  | Com  | 2655m; 11 <sup>0</sup> 40.160'N, 039 <sup>0</sup> 19.810'E | MM063 |
| 128 | <i>Vernonia leopoldii</i> <sup>+</sup> (Sch. Bip.ex Walp.) Vatke | Kokemeri         | Asteraceae       | S  | Evu | Com  | 2392m; 11 <sup>0</sup> 38.818'N, 039 <sup>0</sup> 19.454'E | MM046 |
| 129 | <i>Vernonia schimperi</i> DC.                                    | Yemich           | Asteraceae       | S  | Evu | Com  | 2392m; 11 <sup>0</sup> 38.818'N, 039 <sup>0</sup> 19.454'E | MM20  |
| 130 | <i>Vicia faba</i> L.***                                          | Bakela           | Fabaceae         | H  | Fl  | Com  | 2659m; 11 <sup>0</sup> 40.171'N, 039 <sup>0</sup> 19.812'E | MM057 |
| 131 | <i>Withania somnifera</i> (L.) Dunal in DC.                      | Gizewa           | Solanaceae       | S  | Hgw | Rare | 2651m; 11 <sup>0</sup> 38.147'N, 039 <sup>0</sup> 19.830'E | MM027 |
| 132 | <i>Zehneria scabra</i> (Linn.f.) Sond.                           | Aregresa         | Cucurbitaceae    | Cl | Hgw | Com  | 2654m; 11 <sup>0</sup> 38.141'N, 039 <sup>0</sup> 19.828'E | MM24  |
| 133 | <i>Zingiber officinale</i> Roscoe***                             | Zingibl          | Zingibraceae     | H  | Hg  | Rare | 1892m; 11 <sup>0</sup> 38.818'N, 039 <sup>0</sup> 19.454'E | MM142 |
